# Supplementary material for: FAIRness of Research Data in the European Humanities Landscape
Source: MDPI journal article supplement (doi:10.3390/publications12010006), 2024-03-05
Supplement: s1 [file s1]

Table S1. FAIR levels of assessment

|                   |                                                                                                                                                                |
|-------------------|----------------------------------------------------------------------------------------------------------------------------------------------------------------|
| FINDABLE          |                                                                                                                                                                |
| <b>FsF-F1-01D</b> | Data are assigned a globally unique identifier.                                                                                                                |
| FsF-F1-01D-1      | The identifier is resolvable and follows a defined unique identifier syntax (IRI, URL)                                                                         |
| FsF-F1-01D-2      | Identifier is not resolvable but follows an UUID or HASH type syntax                                                                                           |
| <b>FsF-F1-02D</b> | Data are assigned a persistent identifier.                                                                                                                     |
| FsF-F1-02D-1      | The identifier follows a defined persistent identifier syntax                                                                                                  |
| FsF-F1-02D-2      | The persistent identifier is resolvable                                                                                                                        |
| <b>FsF-F2-01M</b> | Metadata includes descriptive core elements (creator, title, data identifier, publisher, publication date, summary, and keywords) to support data findability. |
| FsF-F2-01M-1      | Metadata has been made available via common web methods                                                                                                        |
| FsF-F2-01M-2      | The core data citation metadata is available                                                                                                                   |
| FsF-F2-01M-3      | Core descriptive metadata is available                                                                                                                         |
| <b>FsF-F3-01M</b> | Metadata include the identifier of the data described.                                                                                                         |
| FsF-F3-01M-1      | Metadata contain data-content related information (file name, size, type)                                                                                      |
| FsF-F3-01M-2      | Metadata contain a PID or URL that indicates the location of the downloadable data content                                                                     |
| <b>FsF-F4-01M</b> | Metadata are offered in a way that they can be retrieved programmatically.                                                                                     |
| FsF-F4-01M-1      | Metadata are given in a way that major search engines can ingest it in their catalogues (JSON-LD, Dublin Core, RDFa)                                           |
| FsF-F4-01M-2      | Metadata are registered in major research data registries (DataCite)                                                                                           |
| ACCESSIBLE        |                                                                                                                                                                |
| <b>FsF-A1-01M</b> | The metadata contains the access level and access conditions of the data.                                                                                      |
| FsF-A1-01M-1      | Information about access restrictions or rights can be identified in metadata                                                                                  |
| FsF-A1-01M-2      | Data access information is machine readable                                                                                                                    |

|                    |                                                                                                              |
|--------------------|--------------------------------------------------------------------------------------------------------------|
| FsF-A1-01M-3       | Data access information is indicated by (not machine readable) standard terms                                |
| <b>FsF-A1-03D</b>  | Data are accessible through a standardised communication protocol.                                           |
| FsF-A1-03D-1       | Metadata includes a resolvable link to data based on standardised web communication protocols.               |
| <b>FsF-A1-02M</b>  | Metadata is accessible through a standardised communication protocol.                                        |
| FsF-A1-02M-1       | The landing page link is based on standardised web communication protocols.                                  |
| INTEROPERABLE      |                                                                                                              |
| <b>FsF-I1-01M</b>  | Metadata are represented using a formal knowledge representation language.                                   |
| FsF-I1-01M-1       | Parsable structured metadata (JSON-LD, RDFa) are embedded in the landing page XHTML/HTML code                |
| FsF-I1-01M-2       | Parsable graph data (RDF, JSON-LD) is accessible through content negotiation, typed links or sparql endpoint |
| <b>FsF-I2-01M</b>  | Metadata uses semantic resources                                                                             |
| FsF-I2-01M-1       | Vocabulary namespace URIs can be identified in metadata                                                      |
| FsF-I2-01M-2       | Namespaces of known semantic resources can be identified in metadata                                         |
| <b>FsF-I2-01M</b>  | Metadata uses semantic resources                                                                             |
| FsF-I3-01M-1       | Related resources are explicitly mentioned in metadata                                                       |
| FsF-I3-01M-2       | Related resources are indicated by machine readable links or identifiers                                     |
| REUSABLE           |                                                                                                              |
| <b>FsF-R1-01MD</b> | Metadata specifies the content of the data.                                                                  |
| FsF-R1-01MD-1      | Minimal information on available data content is given in metadata                                           |
| FsF-R1-01MD-2      | Verifiable data descriptors (file info, measured variables, or observation types) are specified in metadata  |
| FsF-R1-01MD-3      | The data content matches the file type and size specified in metadata                                        |
| FsF-R1-01MD-4      | Data content matches, measured variables, or observation types specified in metadata                         |

|                     |                                                                                                                                                                      |
|---------------------|----------------------------------------------------------------------------------------------------------------------------------------------------------------------|
| <b>FsF-R1.1-01M</b> | Metadata includes licence information under which data can be reused.                                                                                                |
| FsF-R1.1-01M-1      | The licence information is given in an appropriate metadata element                                                                                                  |
| FsF-R1.1-01M-2      | Recognised licence is valid (community specific or registered at SPDX)                                                                                               |
| <b>FsF-R1.2-01M</b> | Metadata includes provenance information on data creation or generation.                                                                                             |
| FsF-R1.2-01M-1      | Metadata contain elements that hold provenance information and can be mapped to PROV                                                                                 |
| FsF-R1.2-01M-2      | The metadata contains provenance information using formal provenance ontologies (PROV-O)                                                                             |
| <b>FsF-R1.3-01M</b> | Metadata follow a standard recommended by the data-target research community.                                                                                        |
| FsF-R1.3-01M-1      | Community-specific metadata standard is detected using namespaces or schemas found in the provided metadata or metadata services outputs                             |
| FsF-R1.3-01M-2      | The community-specific metadata standard is listed in the re3data record of the responsible repository                                                               |
| FsF-R1.3-01M-3      | The multidisciplinary community-endorsed metadata standard (RDA Metadata Standards Catalogue, Fair Sharing) is listed in the re3data record or detected by namespace |
| <b>FsF-R1.3-02D</b> | The data are available in a file format recommended by the target research community.                                                                                |
| FsF-R1.3-02D-1      | The format of a data file given in the metadata is listed in the long-term file format, open file formats, or scientific file formats controlled list                |
| a                   | The format of the data file is an open format                                                                                                                        |
| b                   | The format of the data file is a long term format                                                                                                                    |
| c                   | The format of the data file is a scientific format                                                                                                                   |

Source: Anusuriya Devaraju & Robert Huber. (2020). F-UJI, an automated FAIR Data Assessment Tool (v1.0.0). Zenodo. <https://doi.org/10.5281/zenodo.4063720>
